# Supplementary material
Source: PubMed Central journal article supplement (PMC9357026)

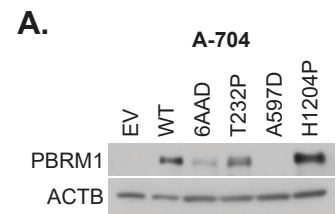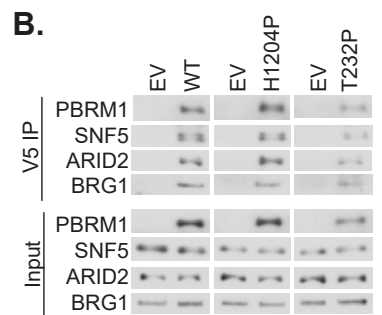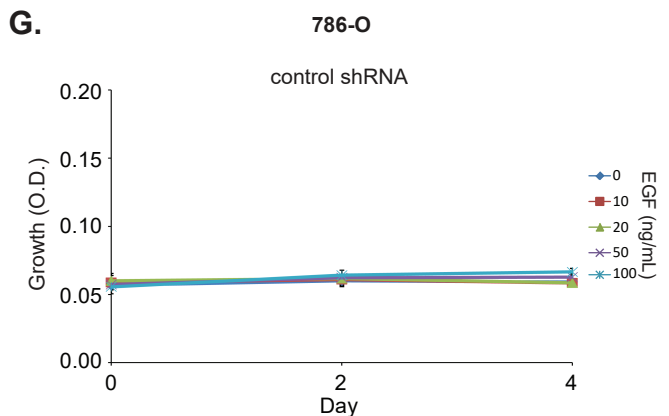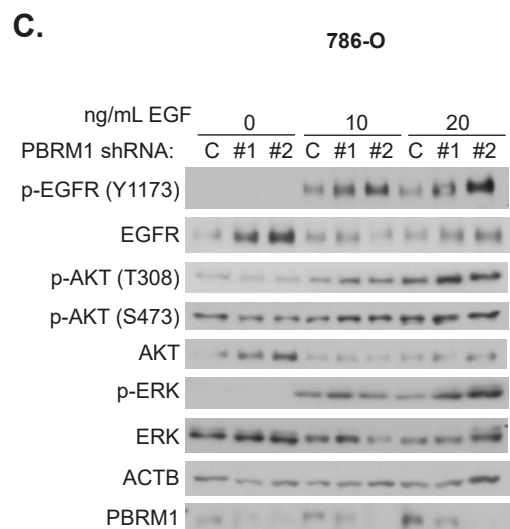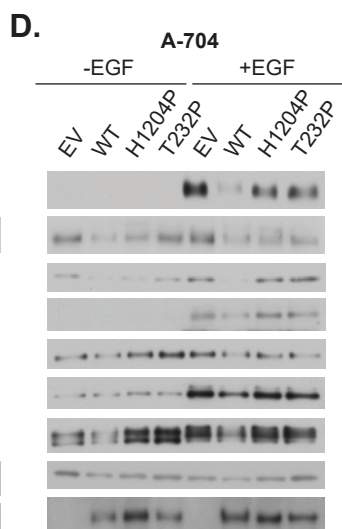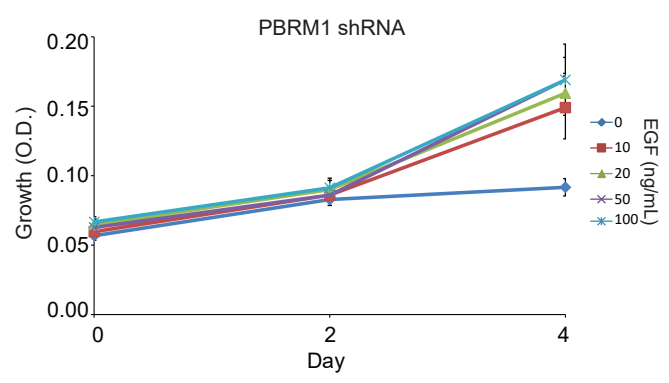

**E.** Quantification of Western blot data for 786-O cells. Values represent relative intensity.

| ng/mL EGF        | 0        |          |          | 10       |          |          | 20       |          |          |
|------------------|----------|----------|----------|----------|----------|----------|----------|----------|----------|
| PBRM1 shRNA      | C        | #1       | #2       | C        | #1       | #2       | C        | #1       | #2       |
| p-EGFR (Y1173)   | 22.1     | 82.0     | 12.1     | 10,062.9 | 21,024.8 | 28,423.0 | 9,771.8  | 22,110.4 | 47,063.3 |
| EGFR             | 6,782.8  | 30,640.4 | 44,571.2 | 10,808.5 | 14,041.5 | 5,815.3  | 9,184.1  | 17,678.8 | 23,710.4 |
| p-EGFR/EGFR      | 0.0      | 0.0      | 0.0      | 0.9      | 1.5      | 4.9      | 1.1      | 1.3      | 2.0      |
| p-AKT (T308)     | 5,187.2  | 3,818.4  | 4,038.1  | 7,160.5  | 12,504.4 | 13,108.8 | 17,610.8 | 30,378.6 | 31,699.3 |
| p-AKT (S473)     | 18,197.5 | 12,410.1 | 12,412.9 | 13,188.2 | 20,577.1 | 19,689.0 | 22,453.4 | 25,943.0 | 28,270.8 |
| AKT              | 7,266.9  | 22,746.1 | 32,785.7 | 5,706.8  | 6,378.2  | 3,534.6  | 7,014.6  | 9,630.3  | 15,449.5 |
| p-AKT (T308)/AKT | 0.7      | 0.2      | 0.1      | 1.3      | 2.0      | 3.7      | 2.5      | 3.2      | 2.1      |
| p-AKT (S473)/AKT | 2.5      | 0.5      | 0.4      | 2.3      | 3.2      | 5.6      | 3.2      | 2.7      | 1.8      |
| p-ERK            | 326.6    | 195.8    | 341.2    | 9,862.8  | 18,472.3 | 13,613.9 | 9,080.1  | 24,389.3 | 40,591.8 |
| ERK              | 32,141.2 | 34,545.8 | 35,653.8 | 19,143.1 | 23,117.6 | 7,410.3  | 11,624.0 | 14,095.2 | 34,127.5 |
| p-ERK/ERK        | 0.0      | 0.0      | 0.0      | 0.5      | 0.8      | 1.8      | 0.8      | 1.7      | 1.2      |

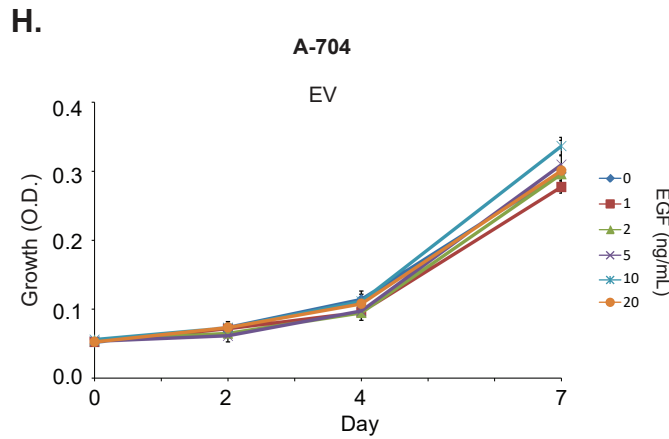

**F.** Quantification of Western blot data for A-704 cells. Values represent relative intensity.

|                  | -EGF     |          |          |          | +EGF     |          |          |          |
|------------------|----------|----------|----------|----------|----------|----------|----------|----------|
|                  | EV       | WT       | H1204P   | T232P    | EV       | WT       | H1204P   | T232P    |
| p-EGFR (Y1173)   | 171.8    | 38.1     | 50.5     | 28.5     | 51,621.3 | 4,478.4  | 28,363.8 | 34,008.5 |
| EGFR             | 43,084.5 | 10,723.8 | 17,276.2 | 41,111.5 | 51,933.2 | 21,681.1 | 28,193.3 | 25,856.8 |
| p-EGFR/EGFR      | 0.0      | 0.0      | 0.0      | 0.0      | 1.0      | 0.2      | 1.0      | 1.3      |
| p-AKT (T308)     | 4,737.5  | 457.8    | 1,327.3  | 3,918.5  | 11,553.2 | 617.1    | 13,097.1 | 17,105.8 |
| p-AKT (S473)     | 72.0     | 96.4     | 218.6    | 397.8    | 17,095.4 | 7,878.2  | 19,537.7 | 16,270.3 |
| AKT              | 11,248.5 | 5,949.5  | 16,914.6 | 25,772.3 | 19,216.2 | 8,500.2  | 11,474.5 | 8,212.7  |
| p-AKT (T308)/AKT | 0.4      | 0.1      | 0.1      | 0.2      | 0.6      | 0.1      | 1.1      | 2.1      |
| p-AKT (S473)/AKT | 0.0      | 0.0      | 0.0      | 0.0      | 0.9      | 0.9      | 1.7      | 2.0      |
| p-ERK            | 2,210.0  | 2,225.2  | 4,120.4  | 3,926.2  | 33,162.6 | 18,029.2 | 30,420.7 | 28,110.8 |
| ERK              | 26,213.4 | 12,362.9 | 45,748.1 | 57,785.5 | 48,525.6 | 28,047.5 | 48,760.0 | 46,786.6 |
| p-ERK/ERK        | 0.1      | 0.2      | 0.1      | 0.1      | 0.7      | 0.6      | 0.6      | 0.6      |

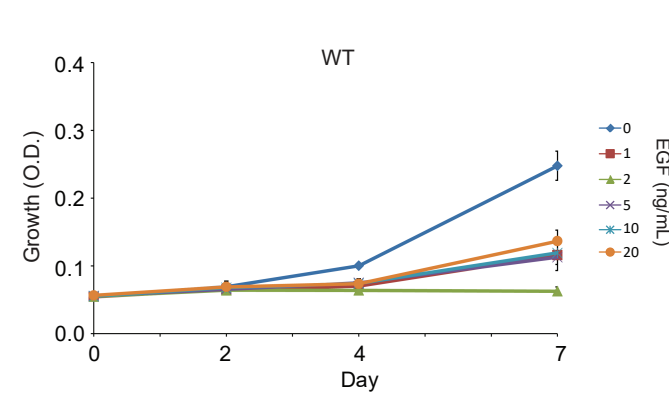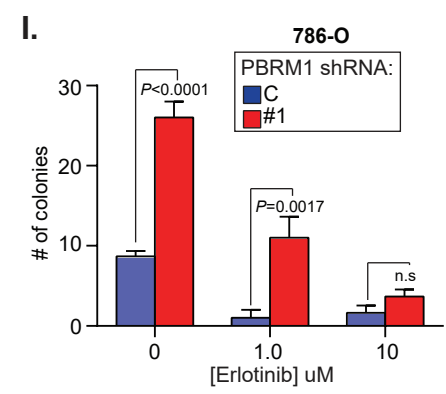

Supplement: NIHMS1799067-supplement-2.pdf [file NIHMS1799067-supplement-2.pdf]
