# Supplementary material
Source: PubMed Central journal article supplement (PMC9357026)

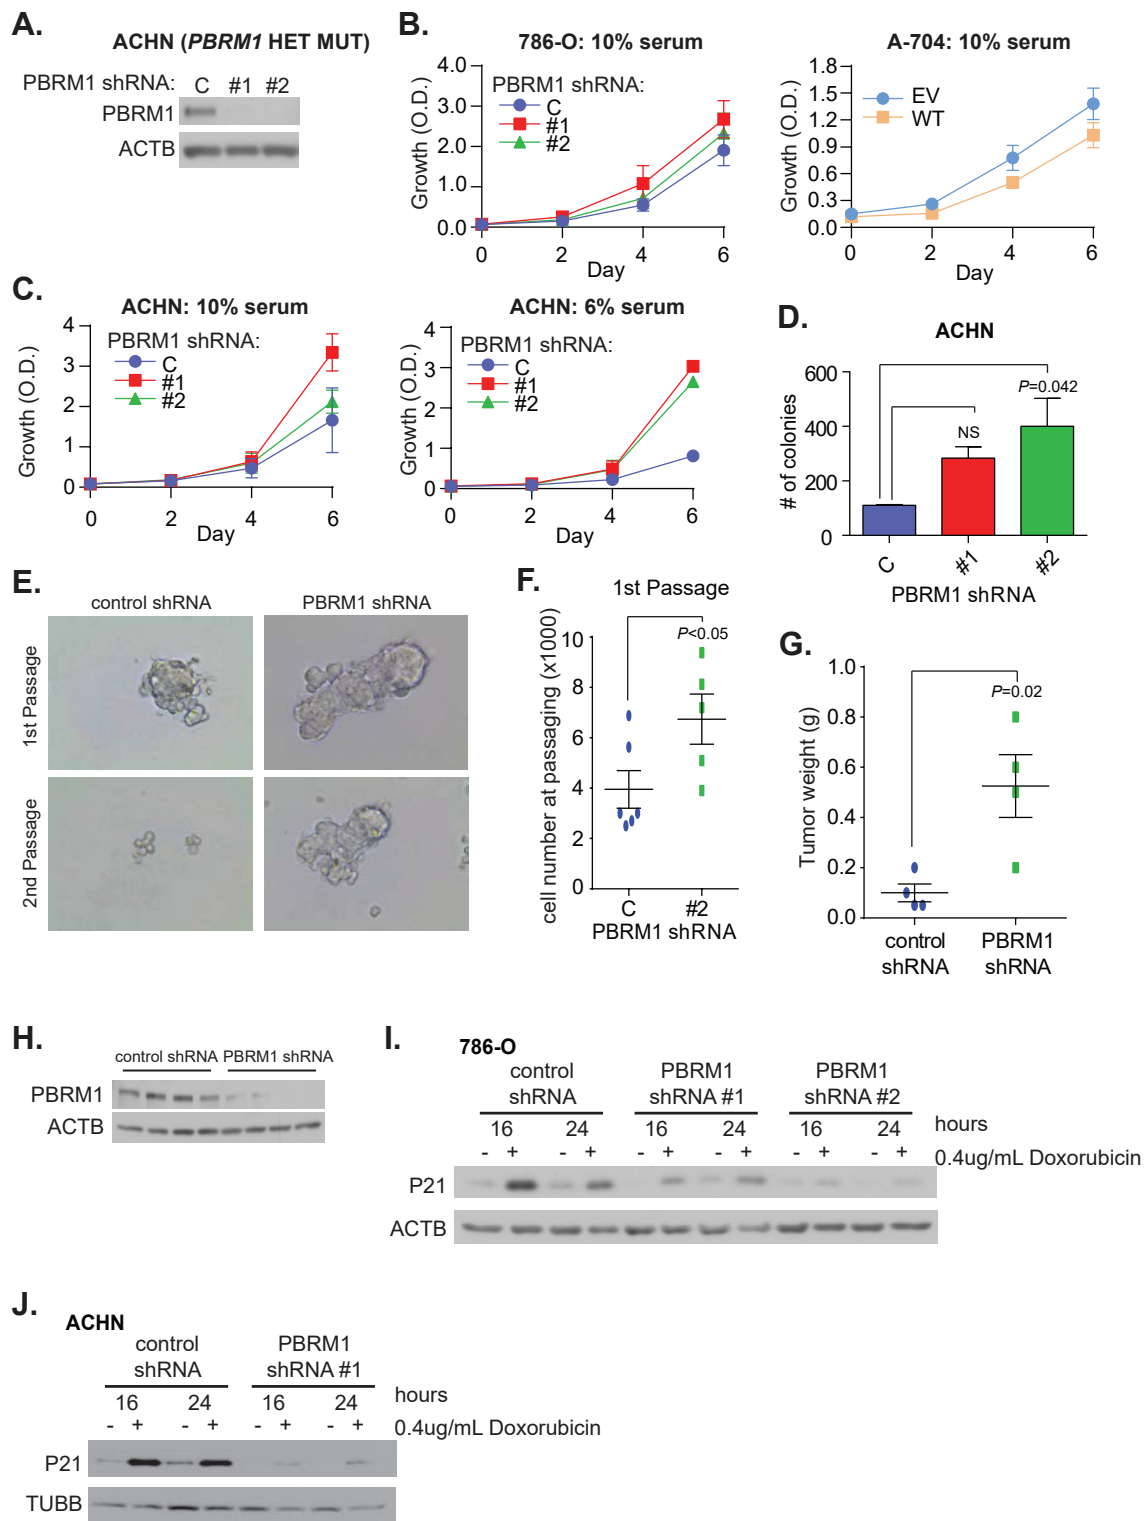

Supplement: NIHMS1799067-supplement-1.pdf [file NIHMS1799067-supplement-1.pdf]

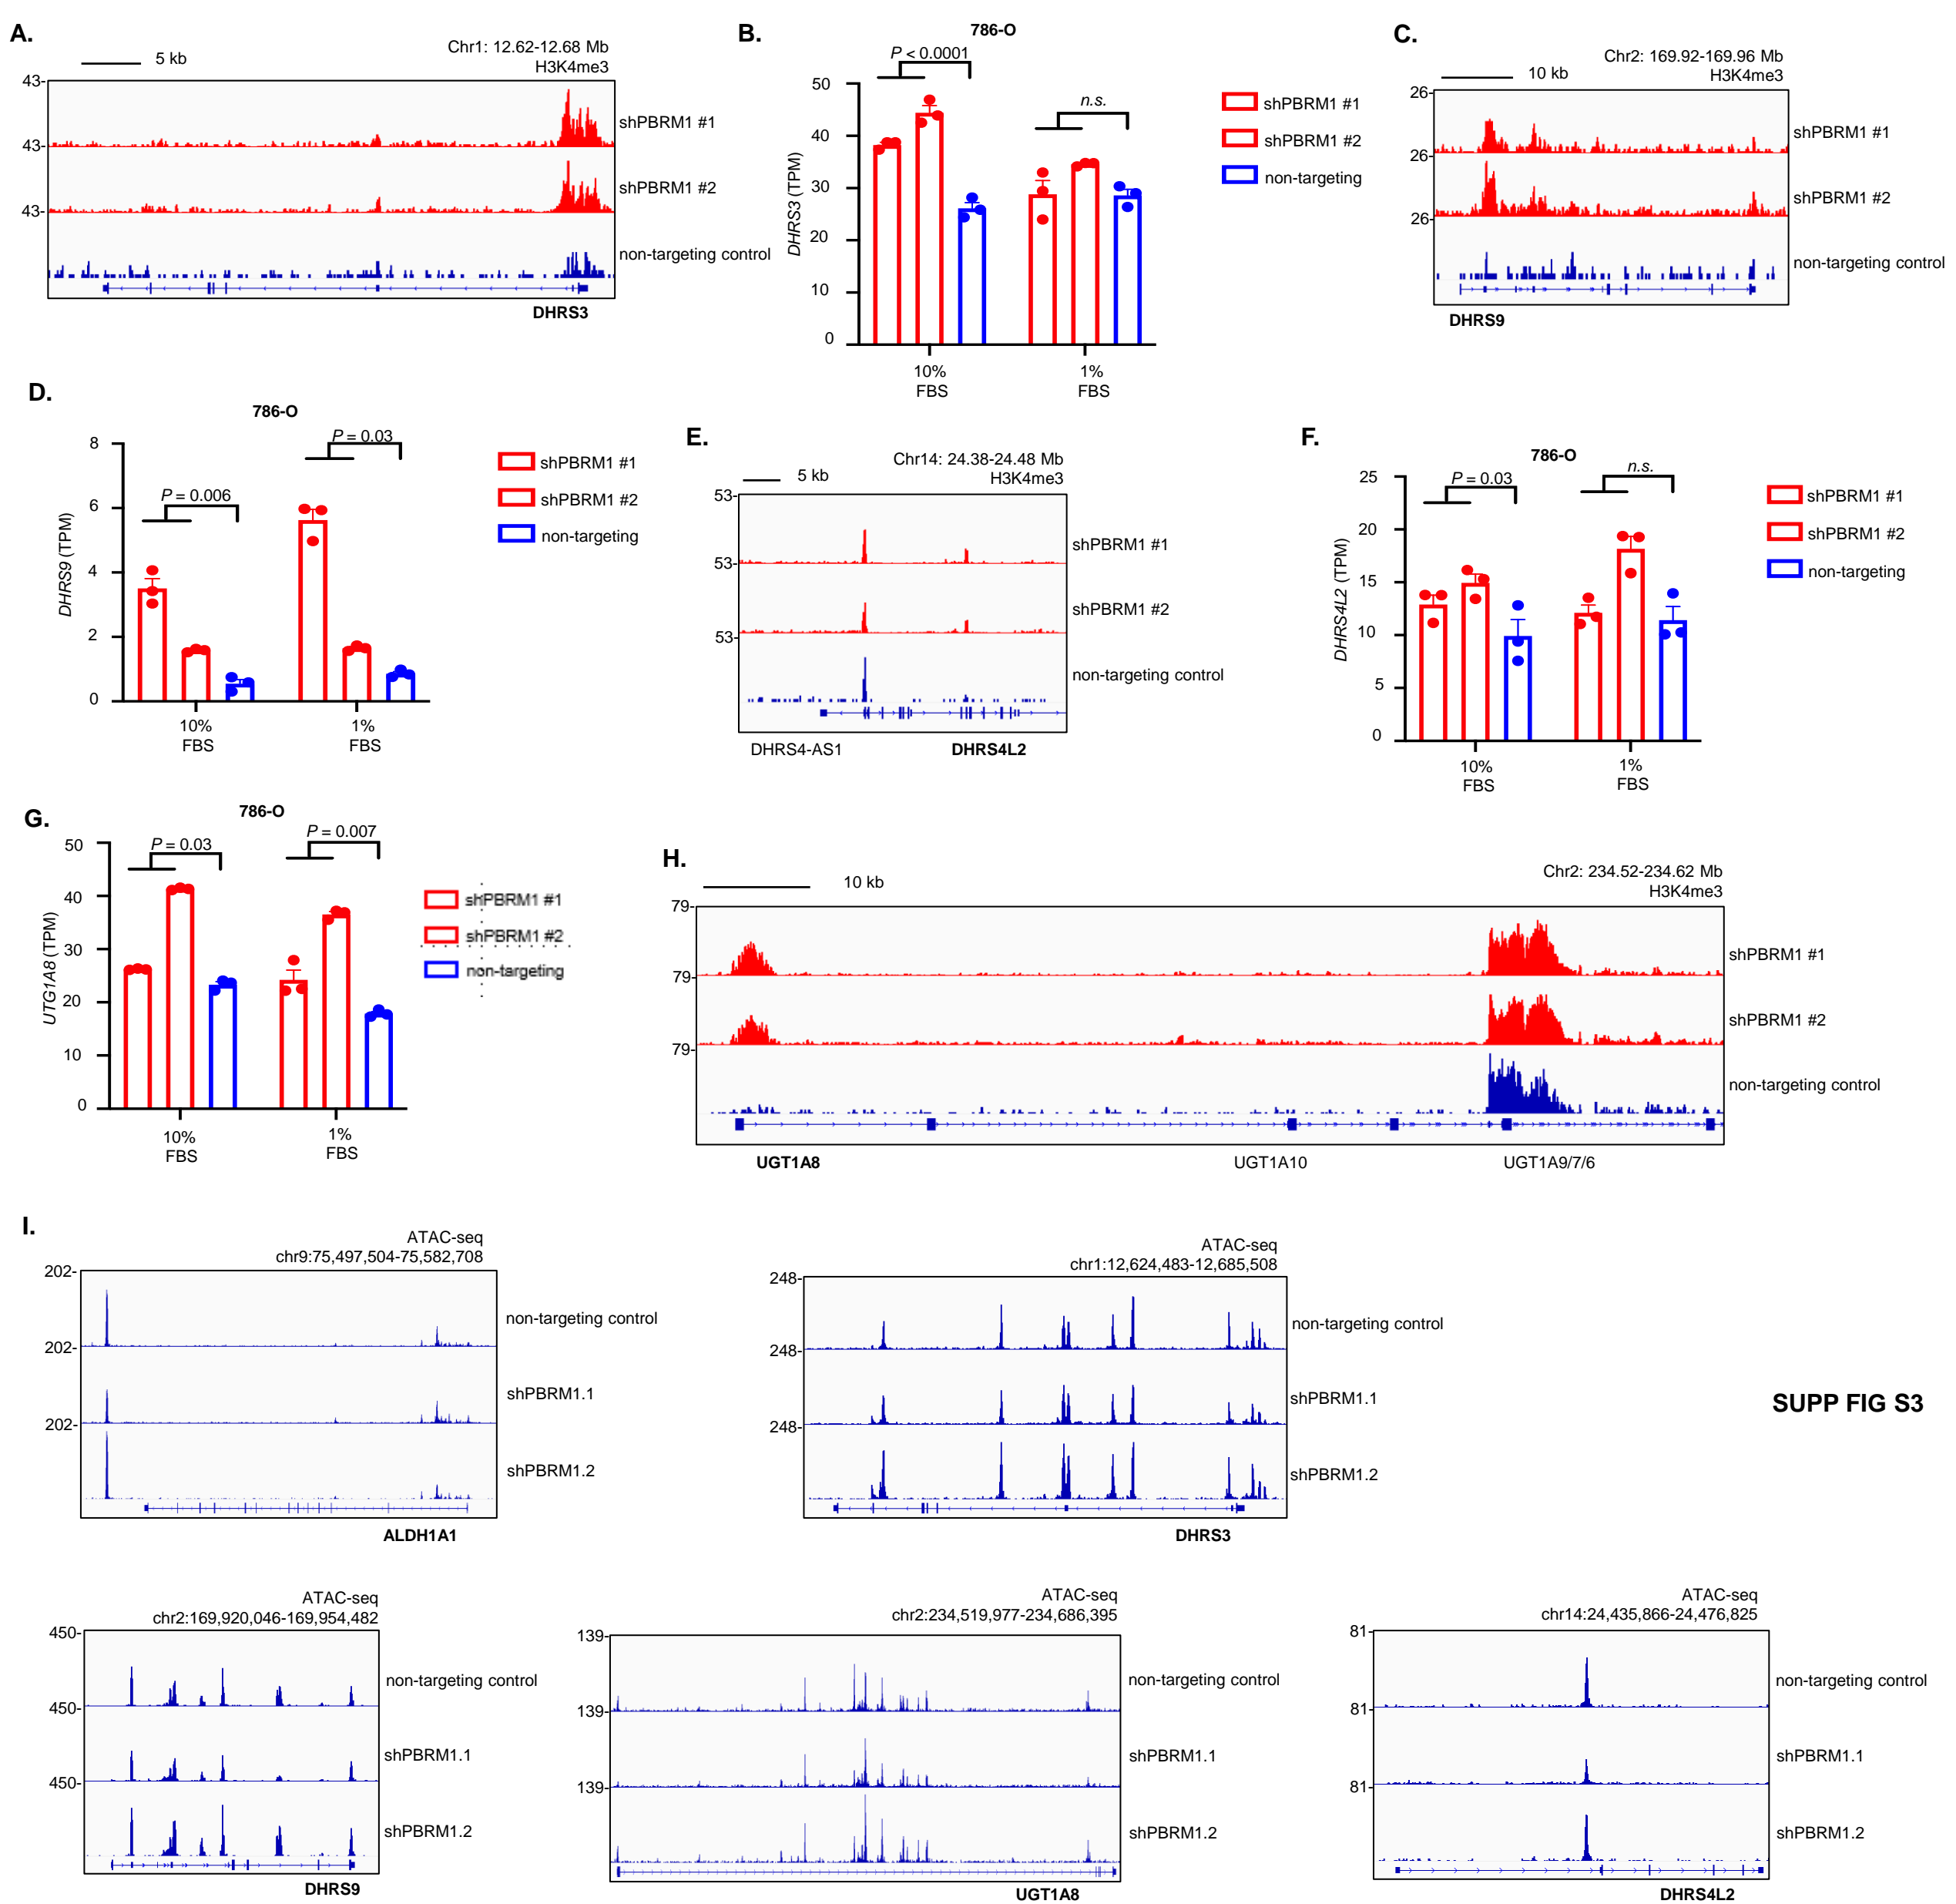

Supplement: NIHMS1799067-supplement-3.pdf [file NIHMS1799067-supplement-3.pdf]

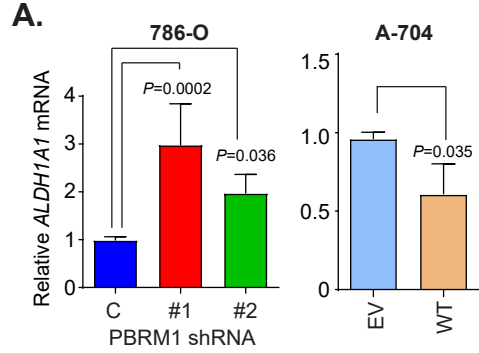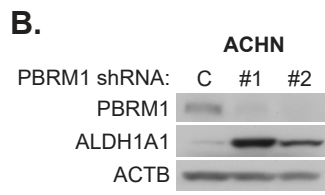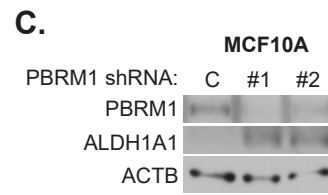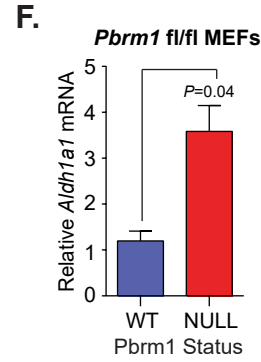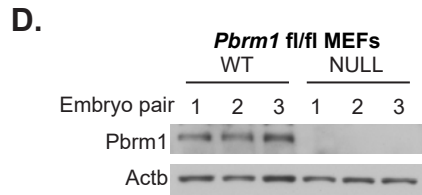

**E.** Heatmap: Top 50 Altered Genes

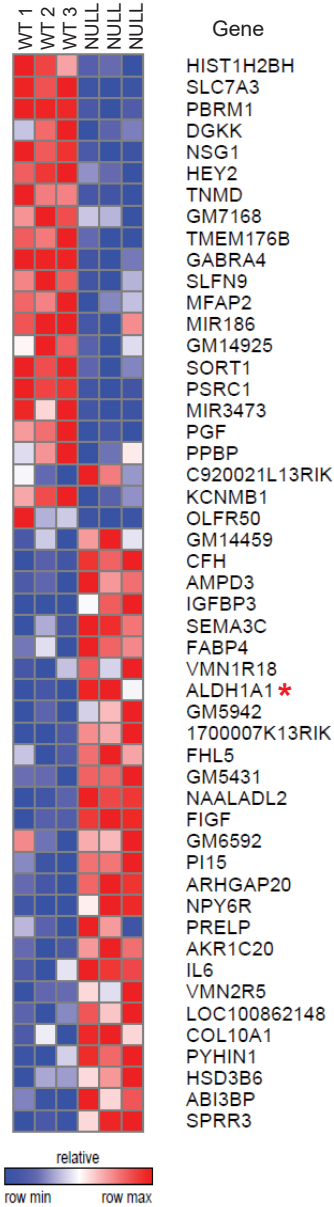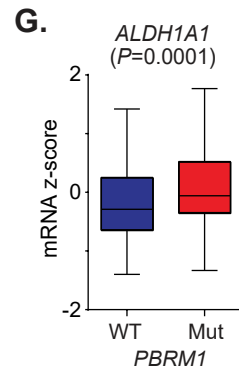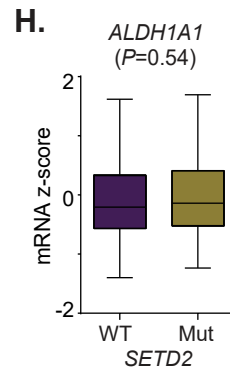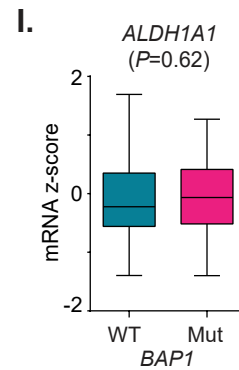

TCGA ccRCC

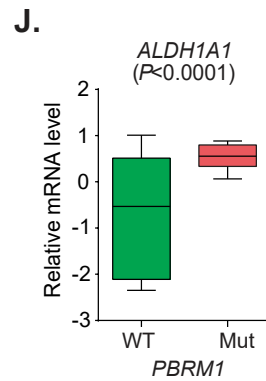

Peña-Llopis et al

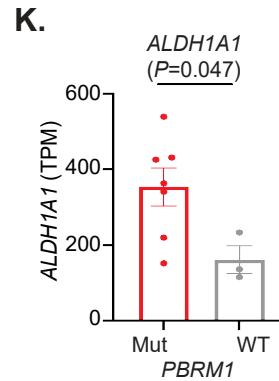

Yao et al

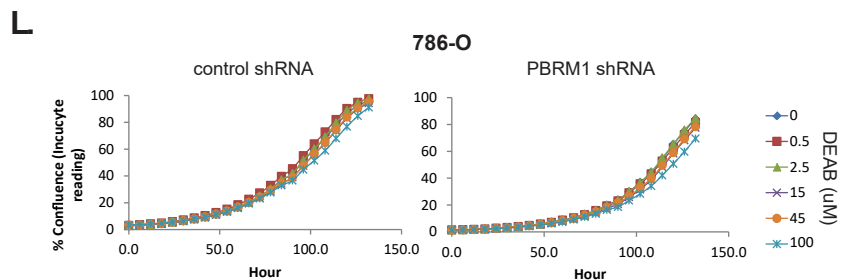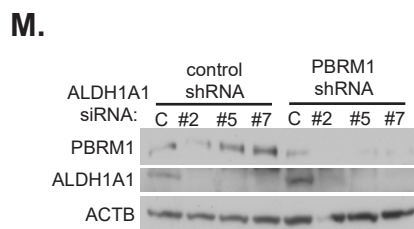

Supplement: NIHMS1799067-supplement-4.pdf [file NIHMS1799067-supplement-4.pdf]

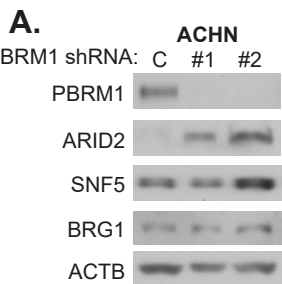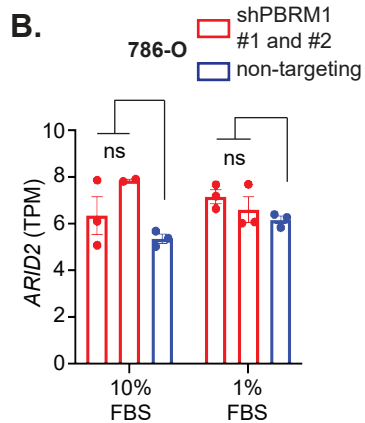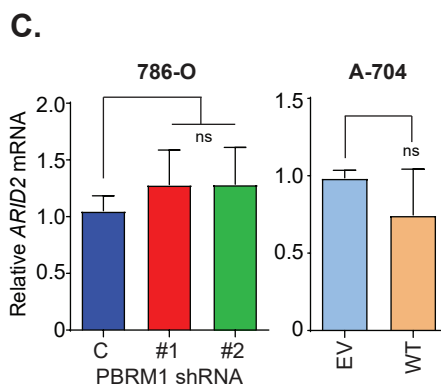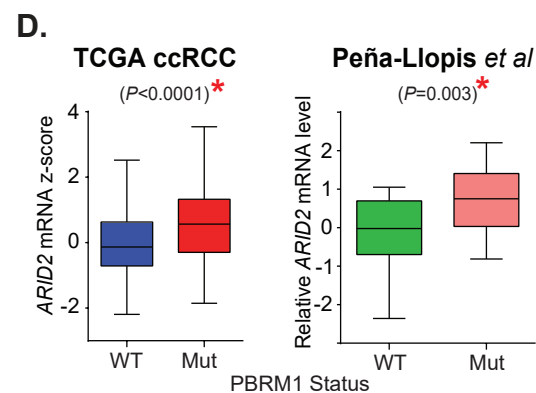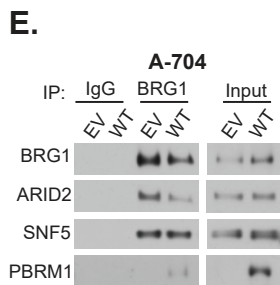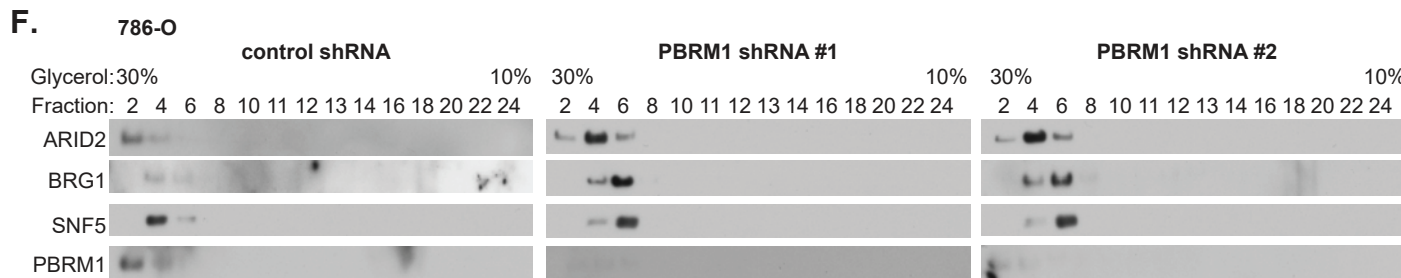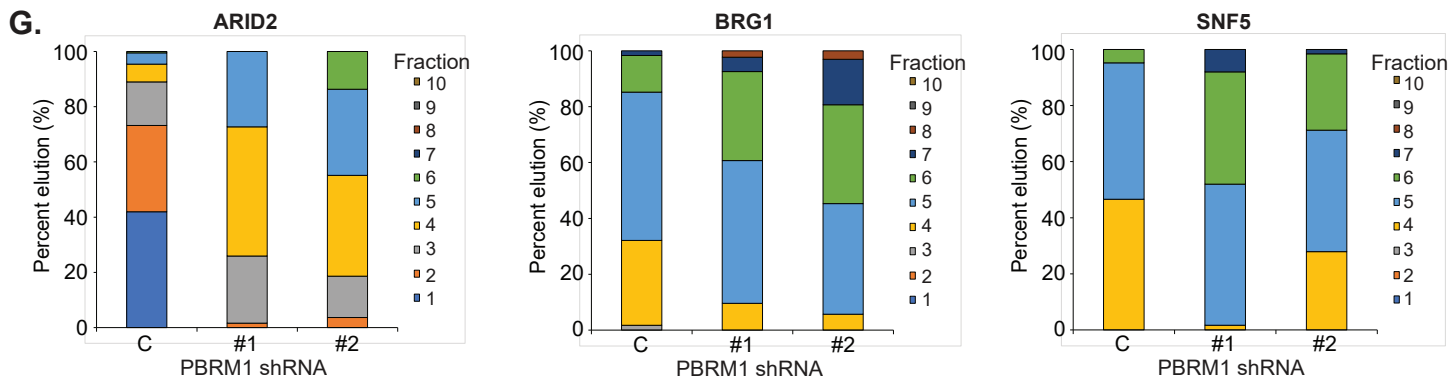

Supplement: NIHMS1799067-supplement-5.pdf [file NIHMS1799067-supplement-5.pdf]

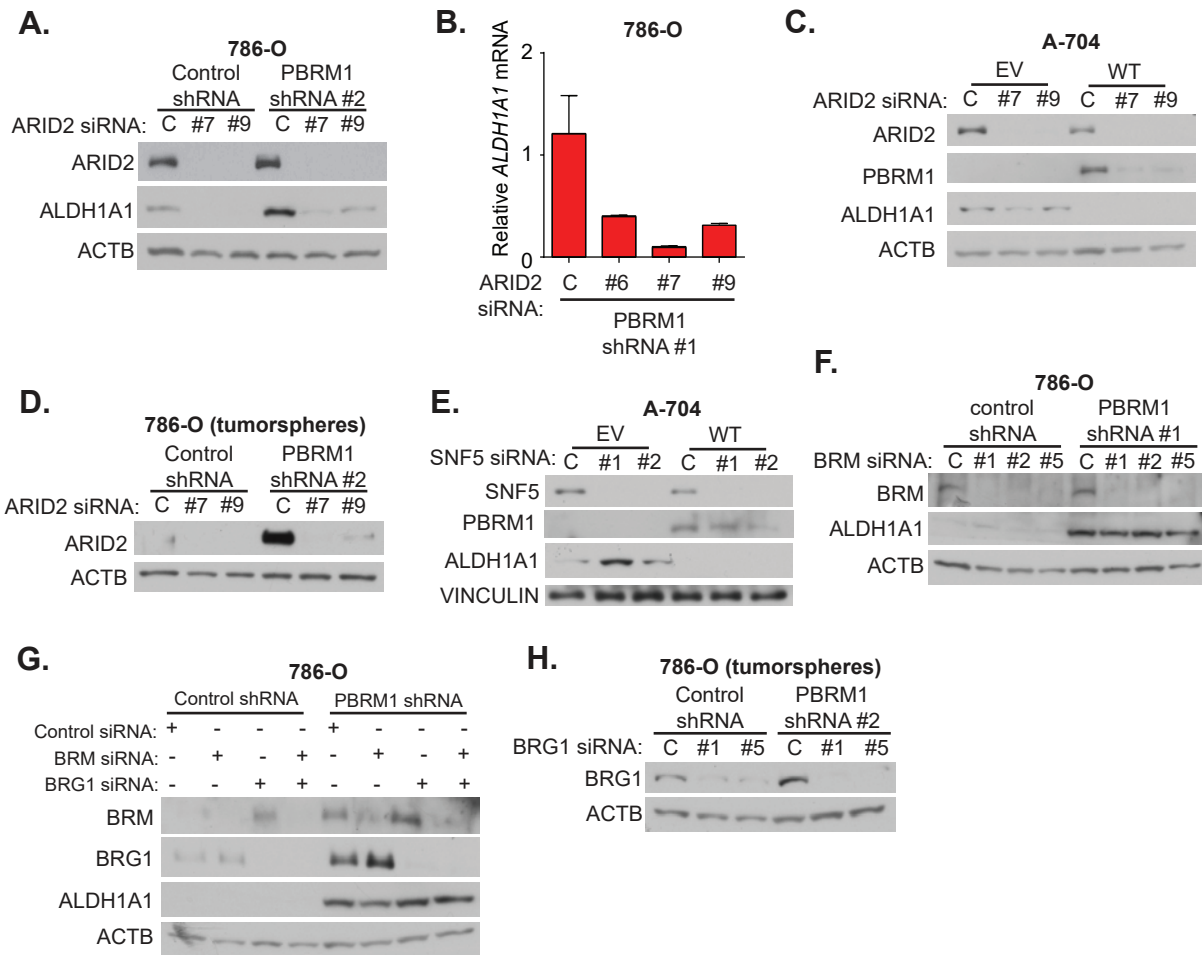

Supplement: NIHMS1799067-supplement-6.pdf [file NIHMS1799067-supplement-6.pdf]
